# Supplementary material for: Neural architecture in lymphoid organs: Hard‐wired antigen presenting cells and neurite networks in antigen entrance areas
Source: PubMed Central journal article supplement (PMC5946157; doi:10.1002/iid3.223), 2018-04-10
Supplement: IID3-6-354-s001.pdf [file IID3-6-354-s001.pdf]

**A**

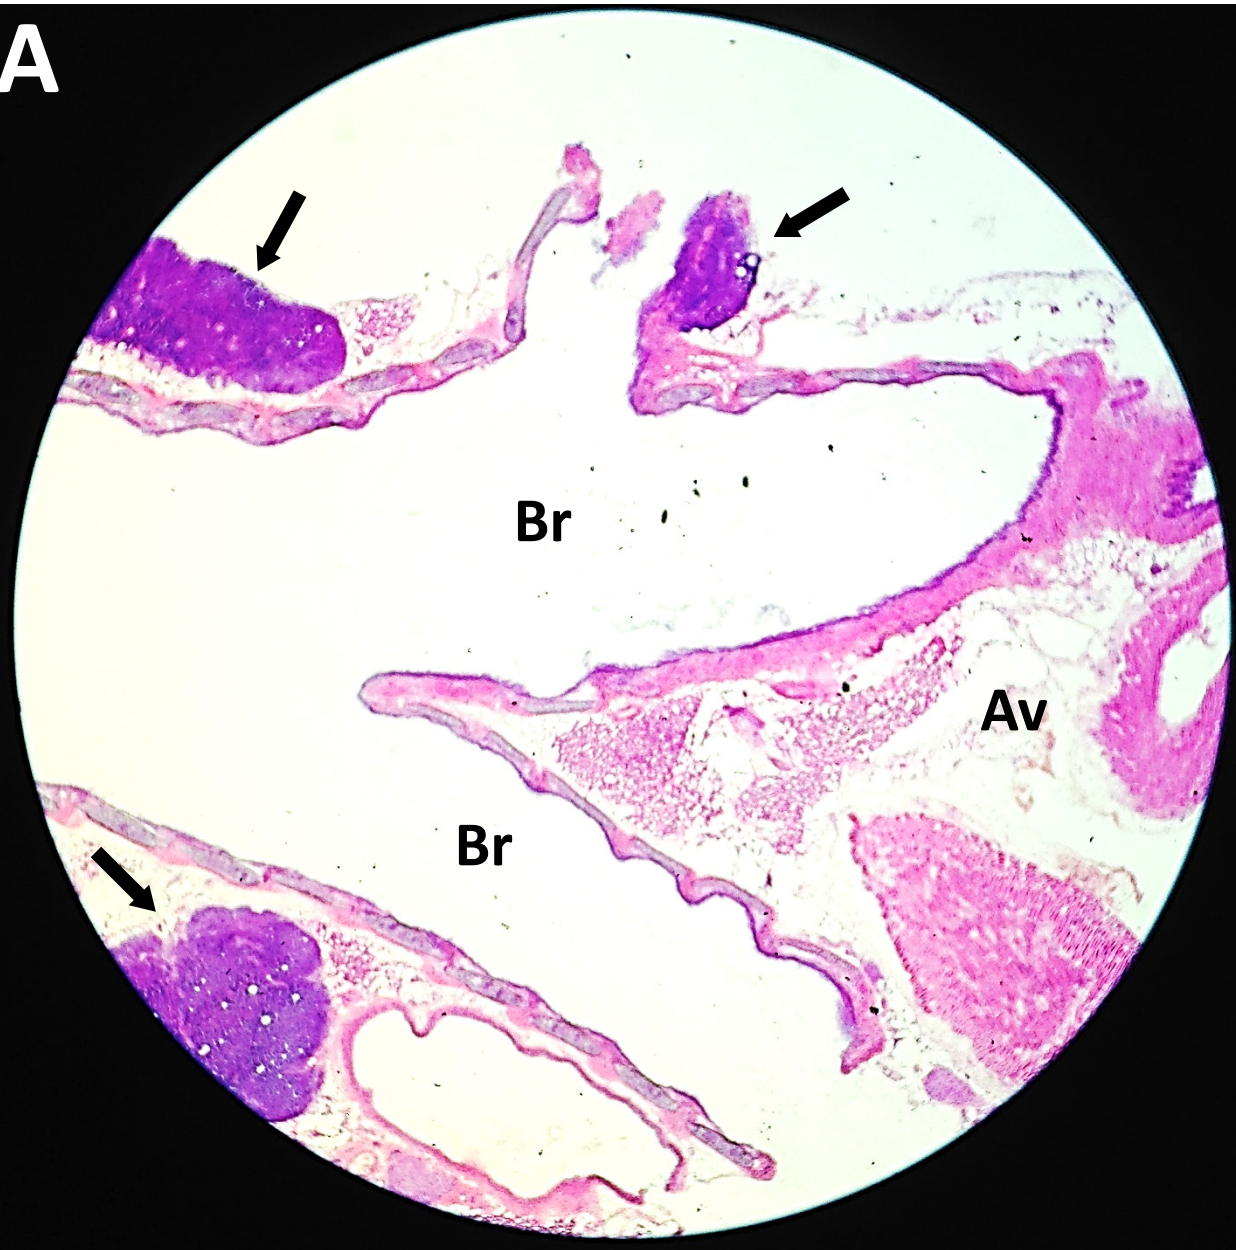

**B**

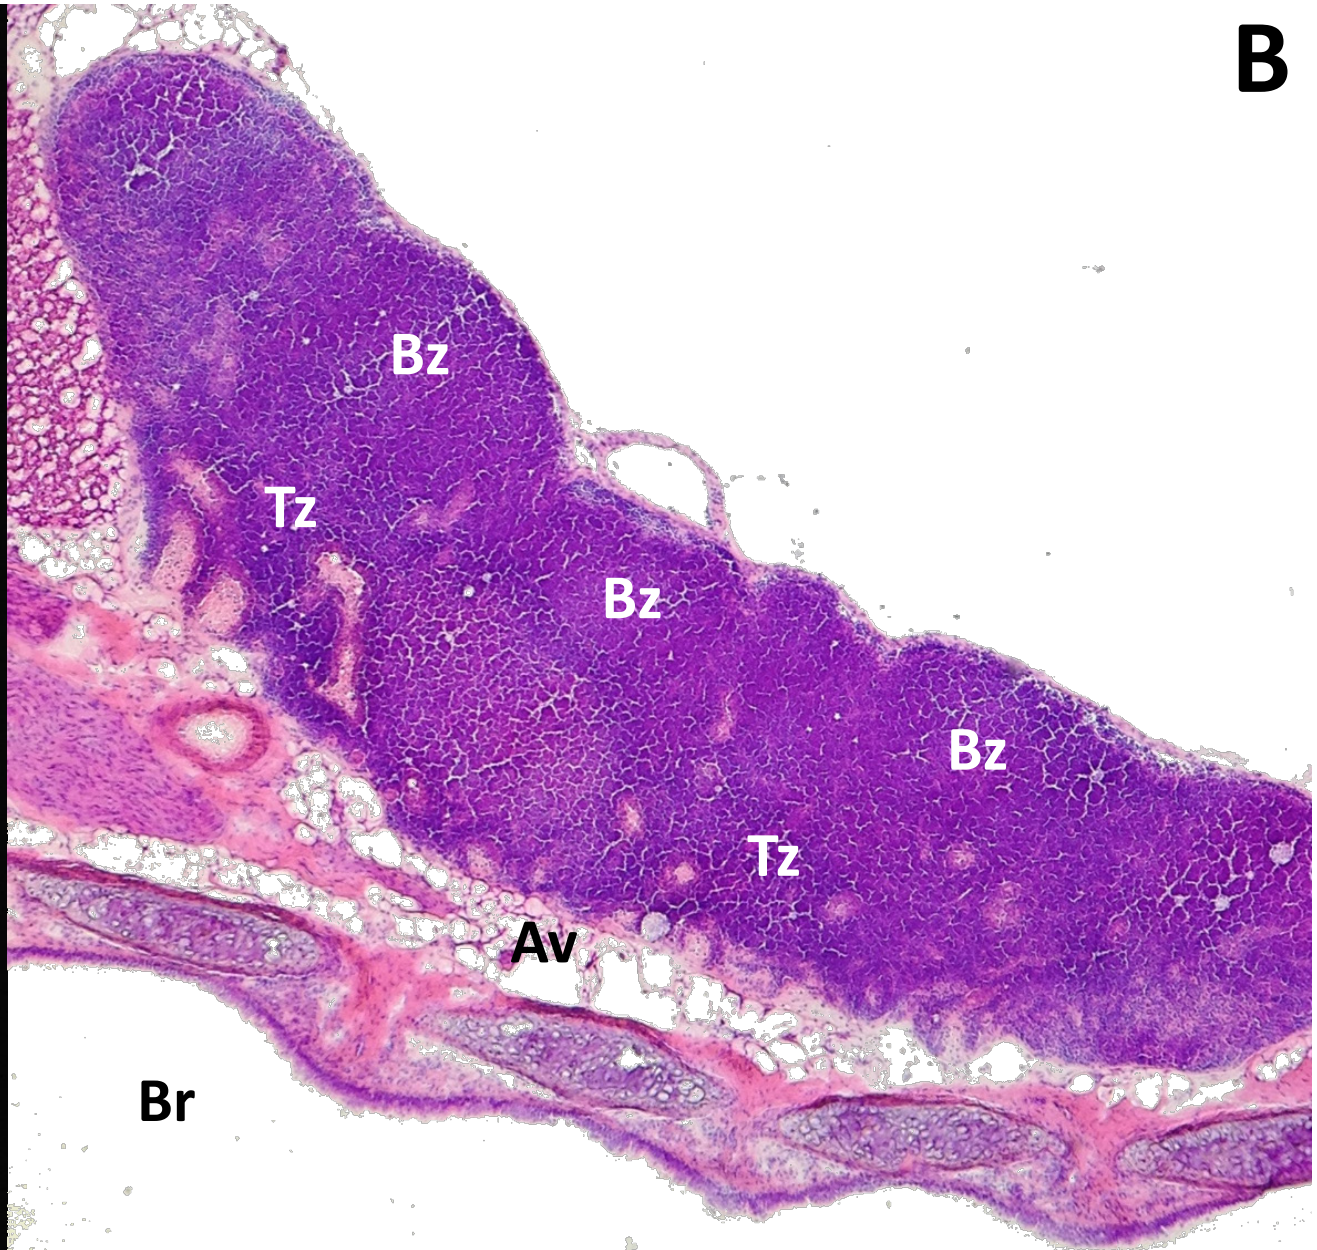

**Supplementary figure a**  
**(BALT)**



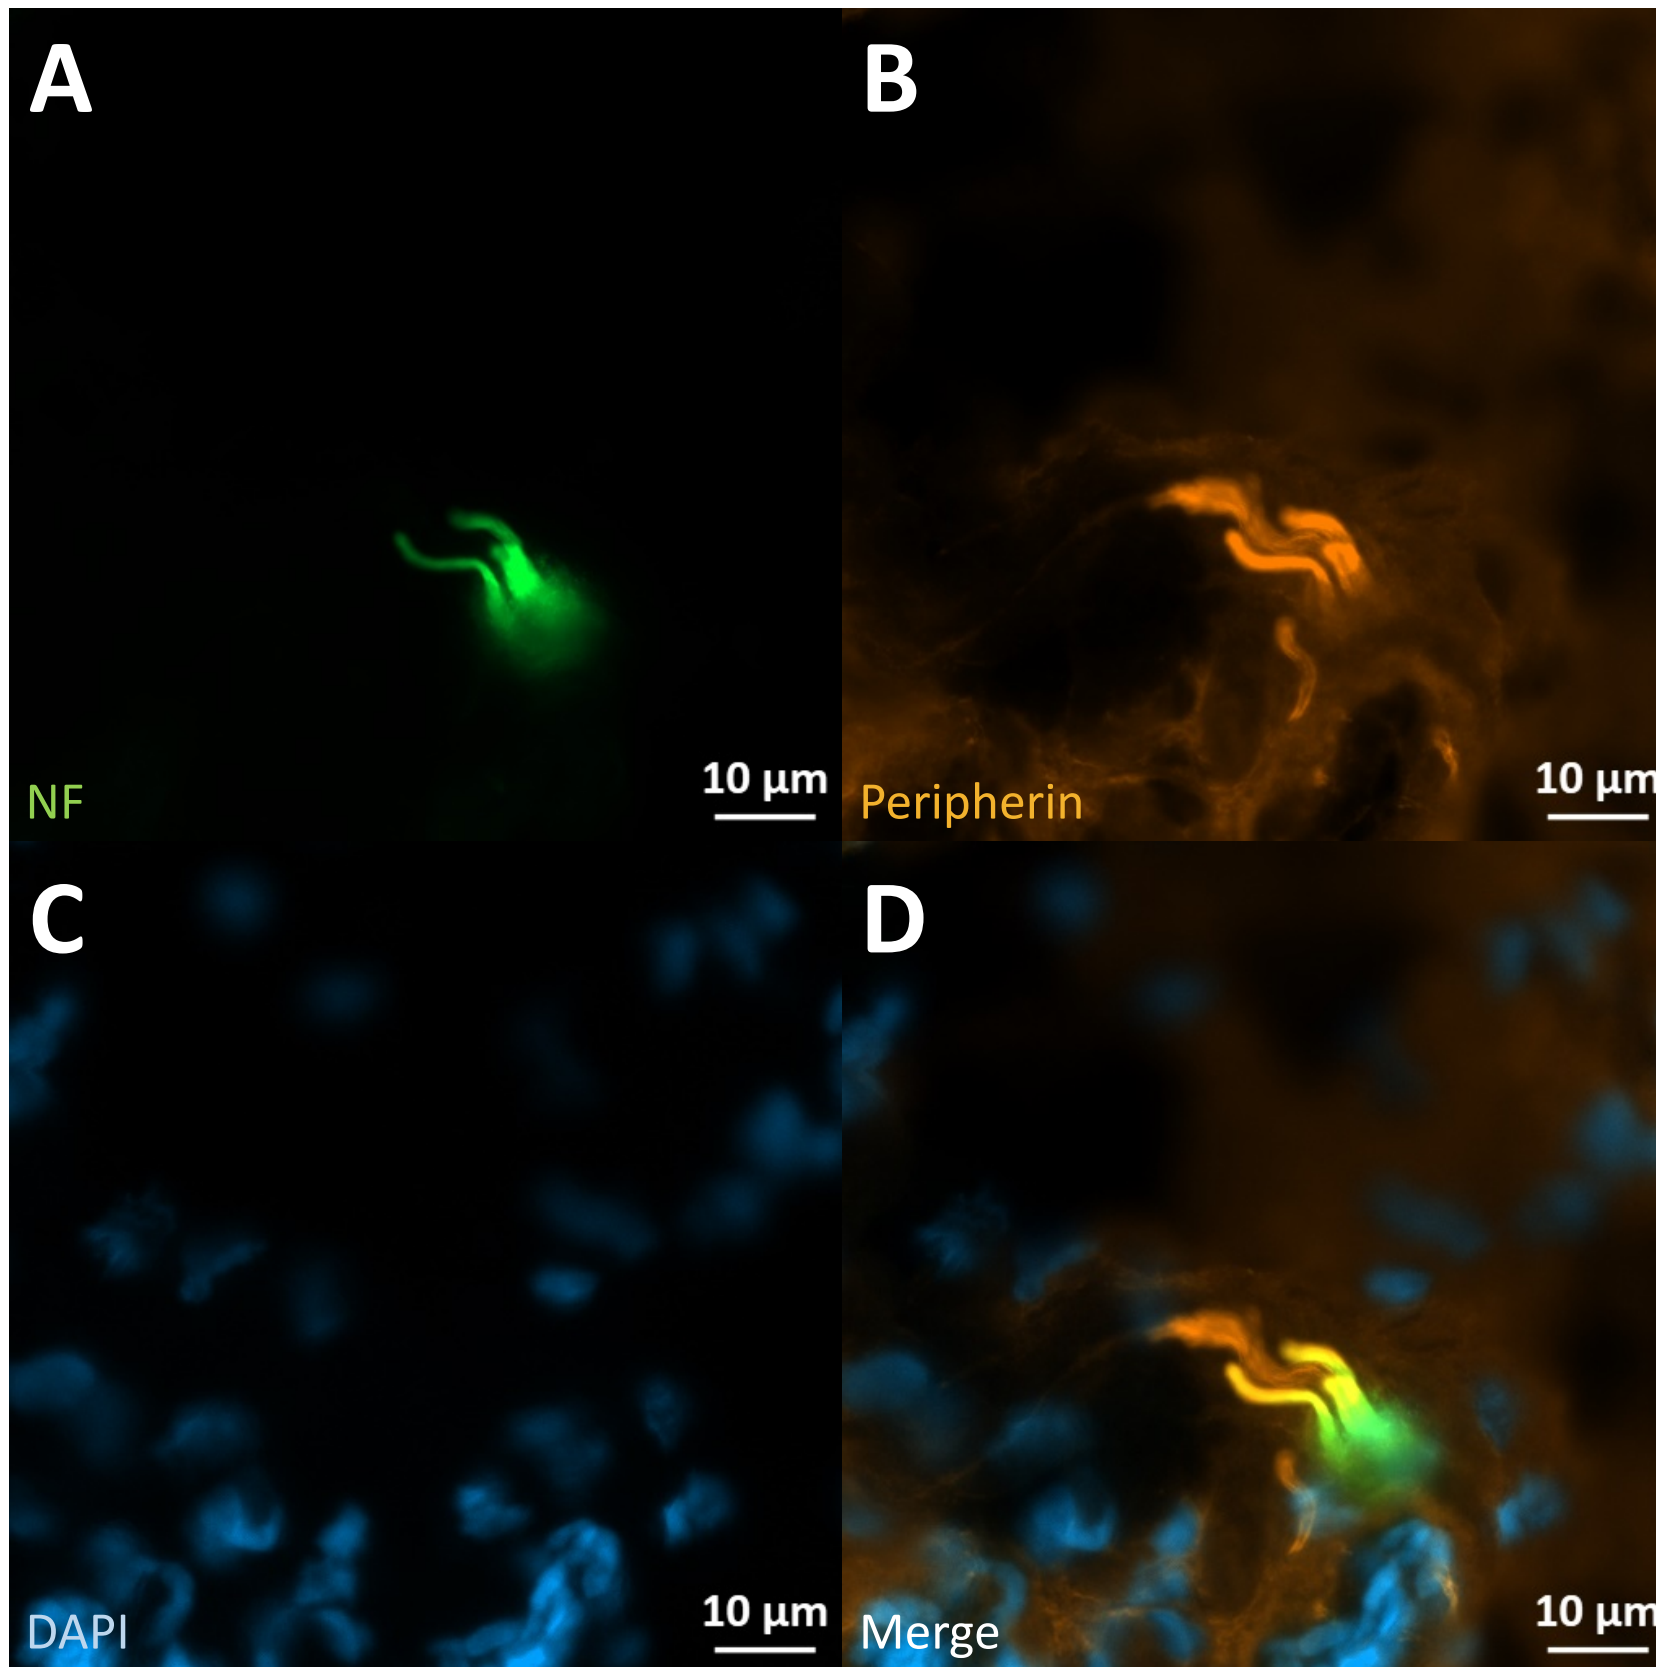

**Supplementary figure c**

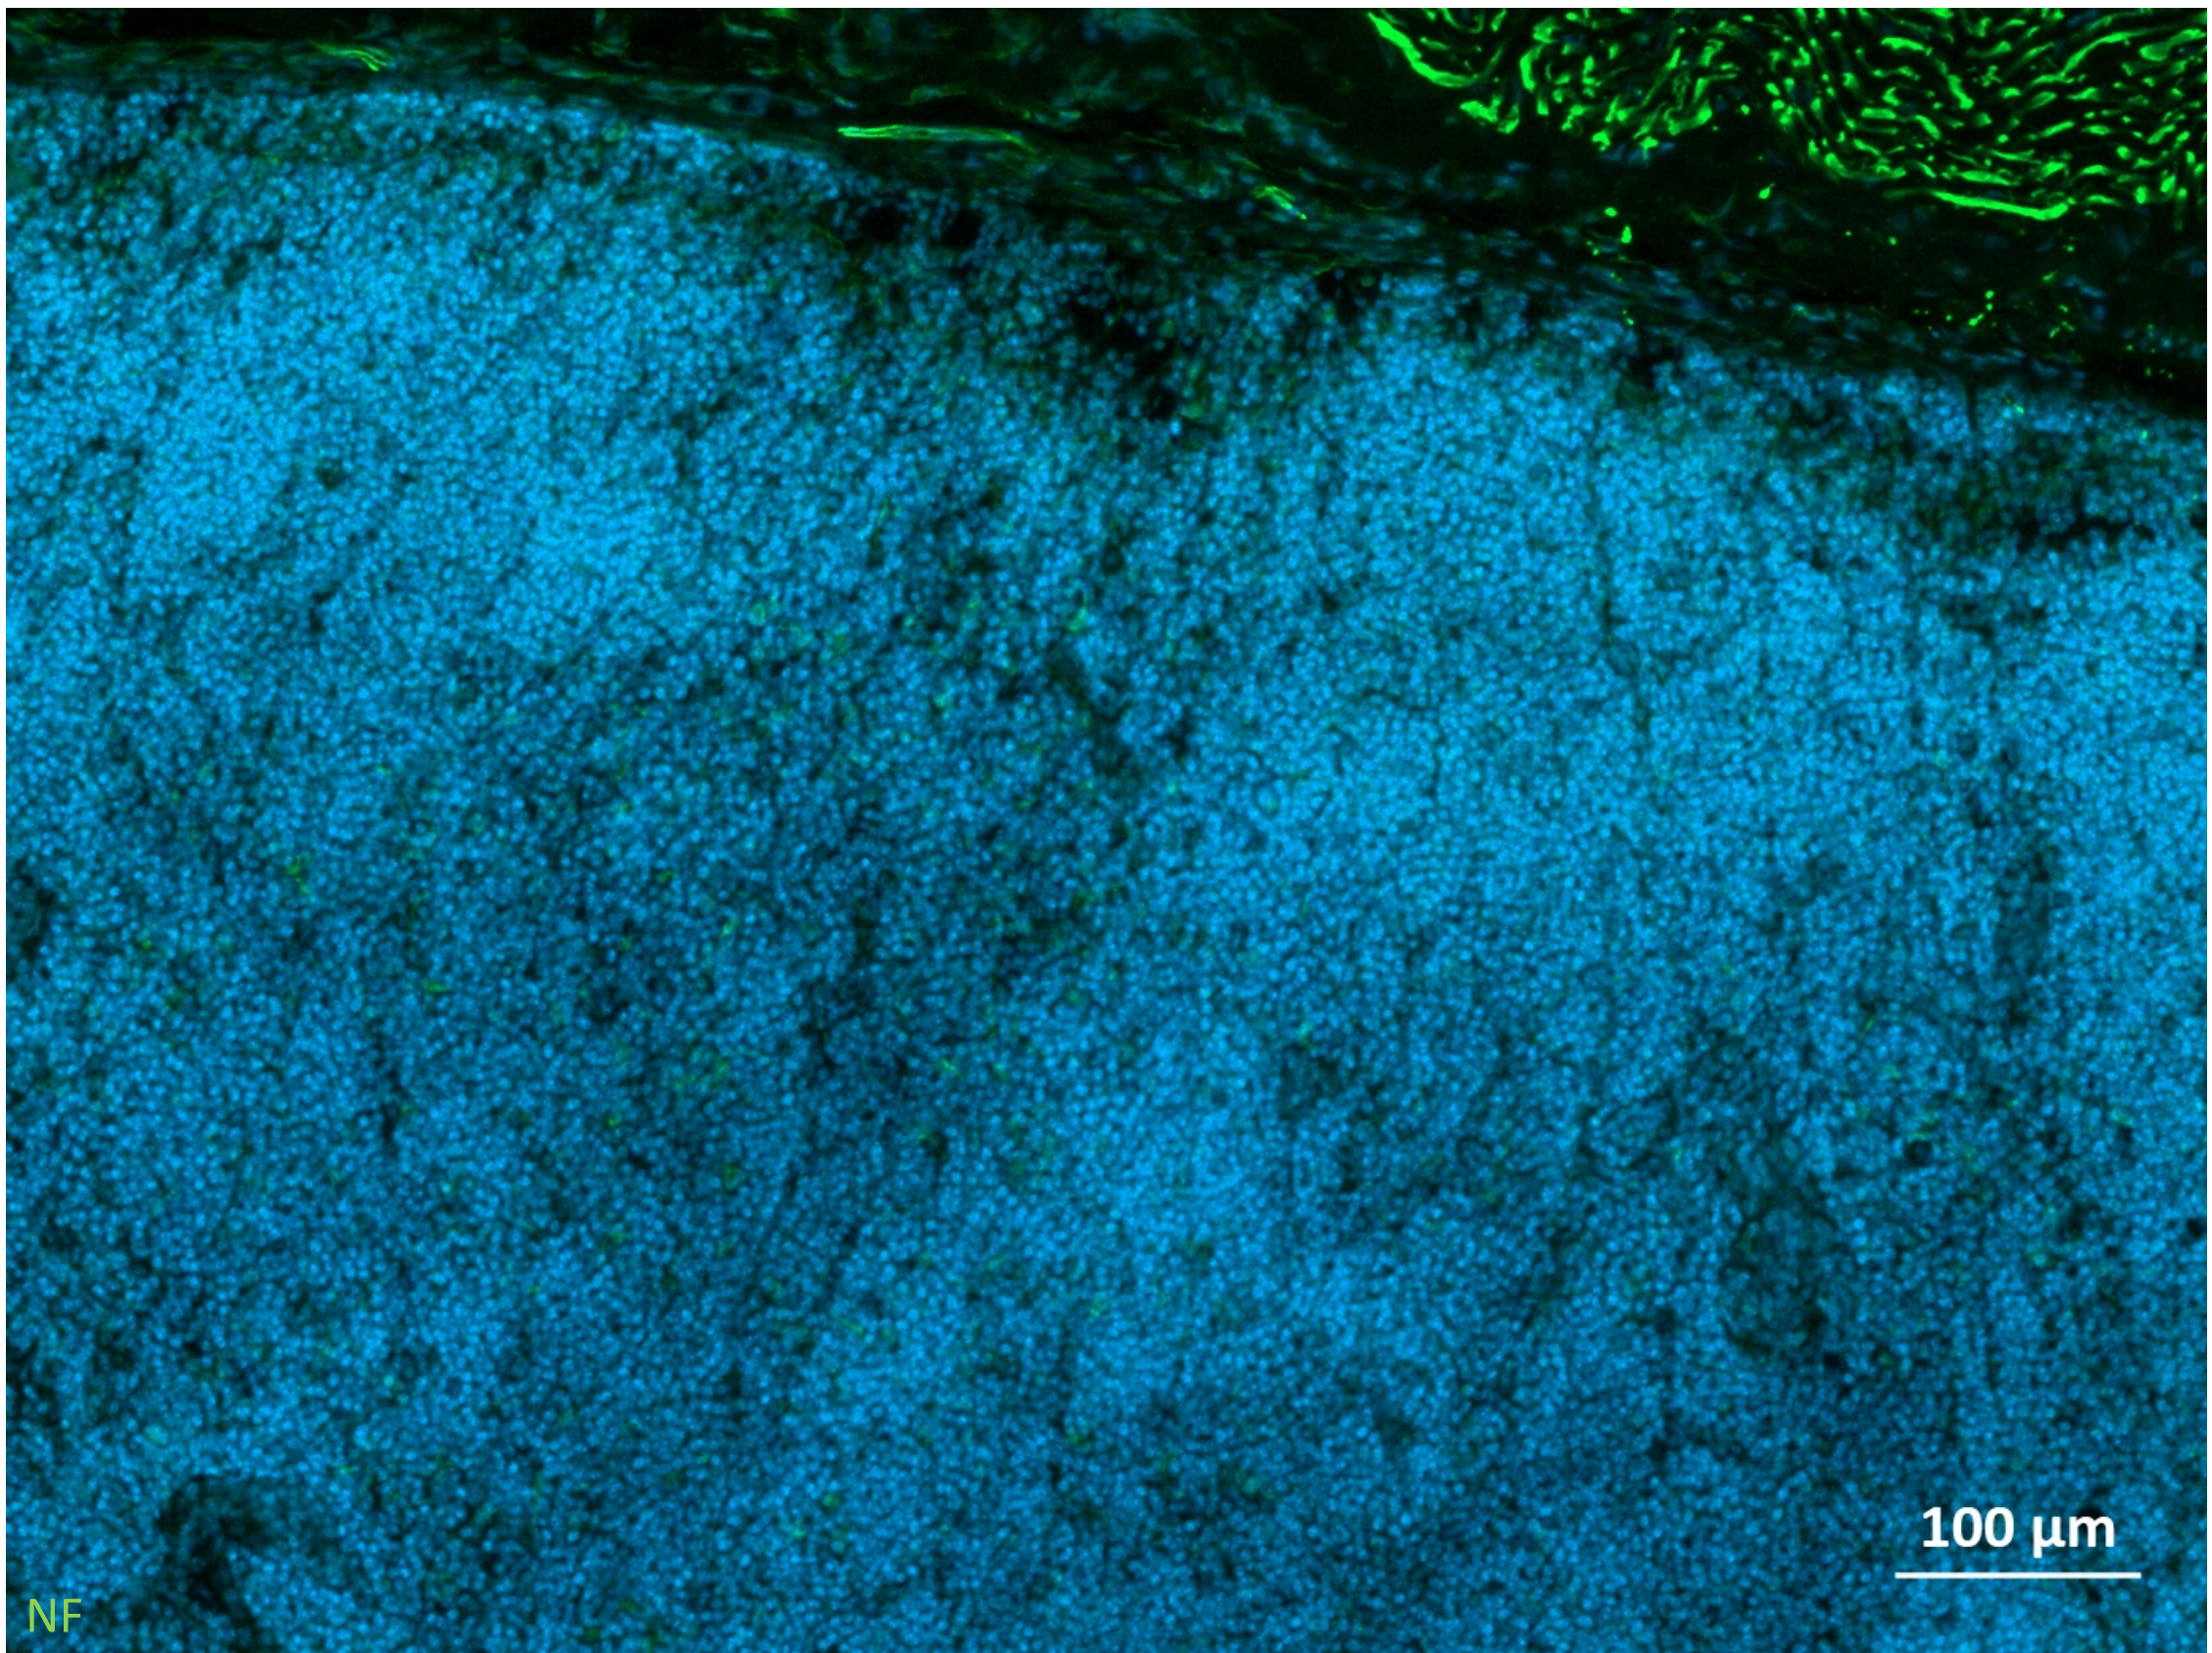

**Supplementary figure d**

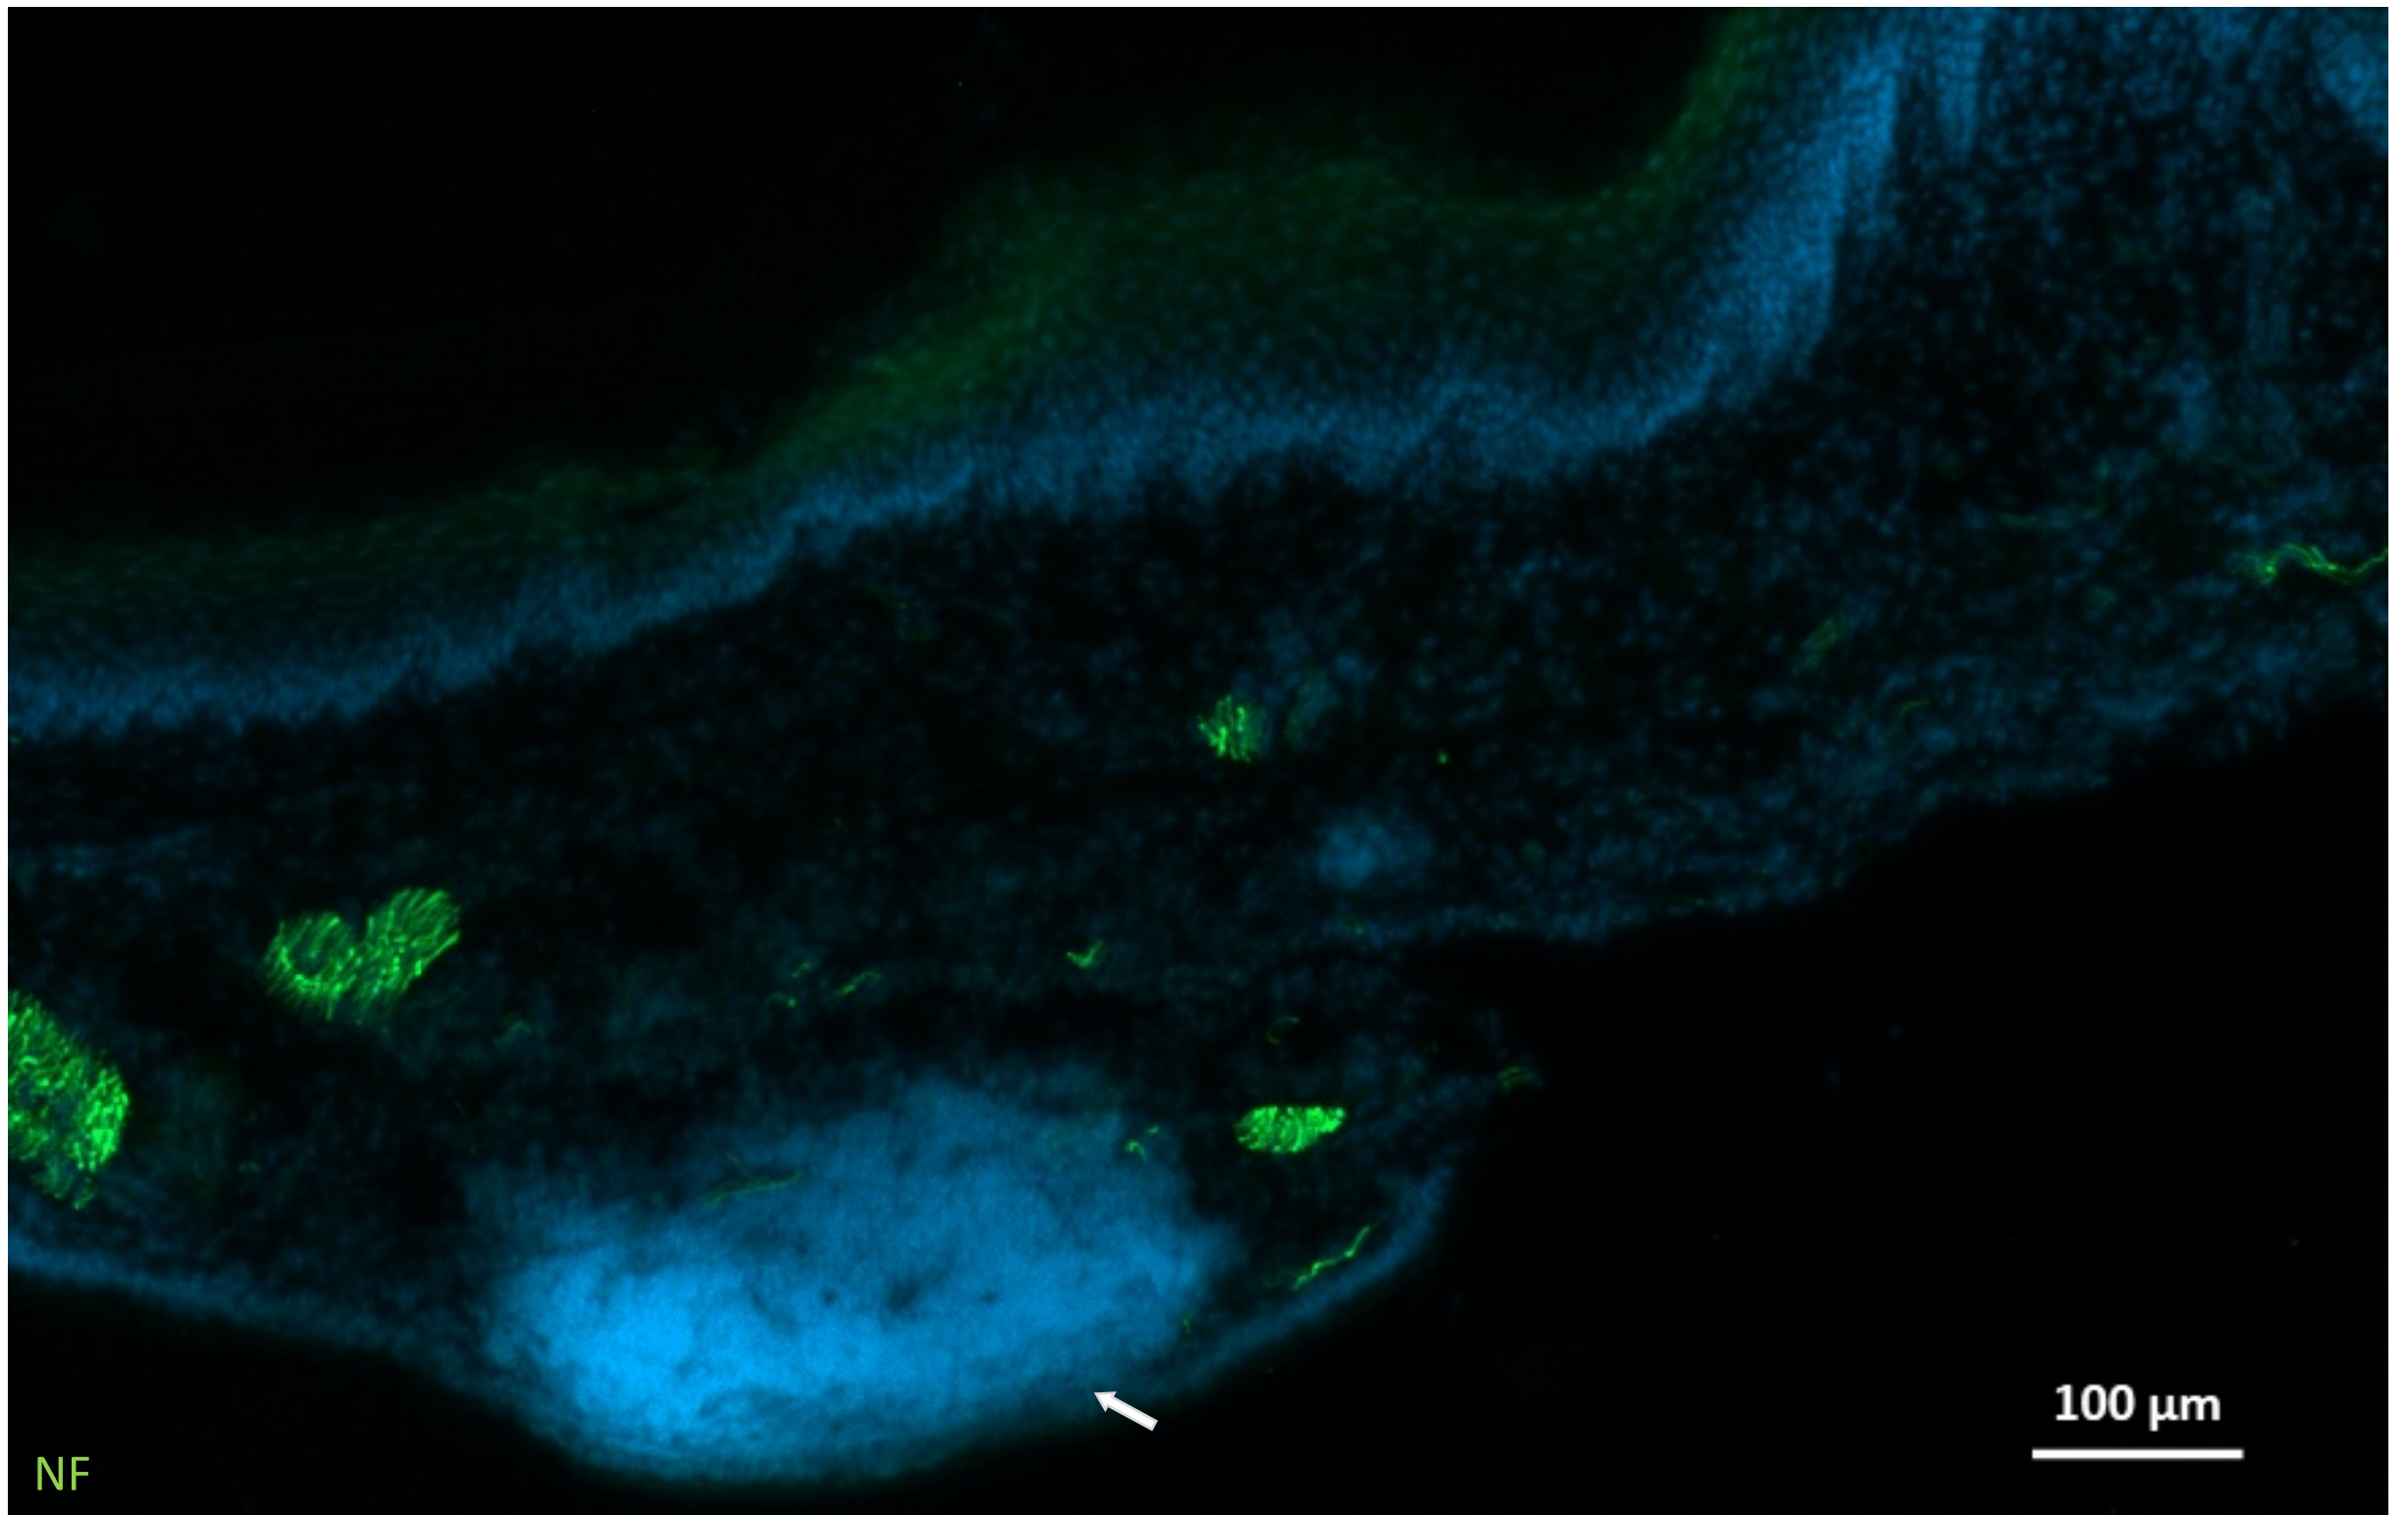

**Supplementary figure e**

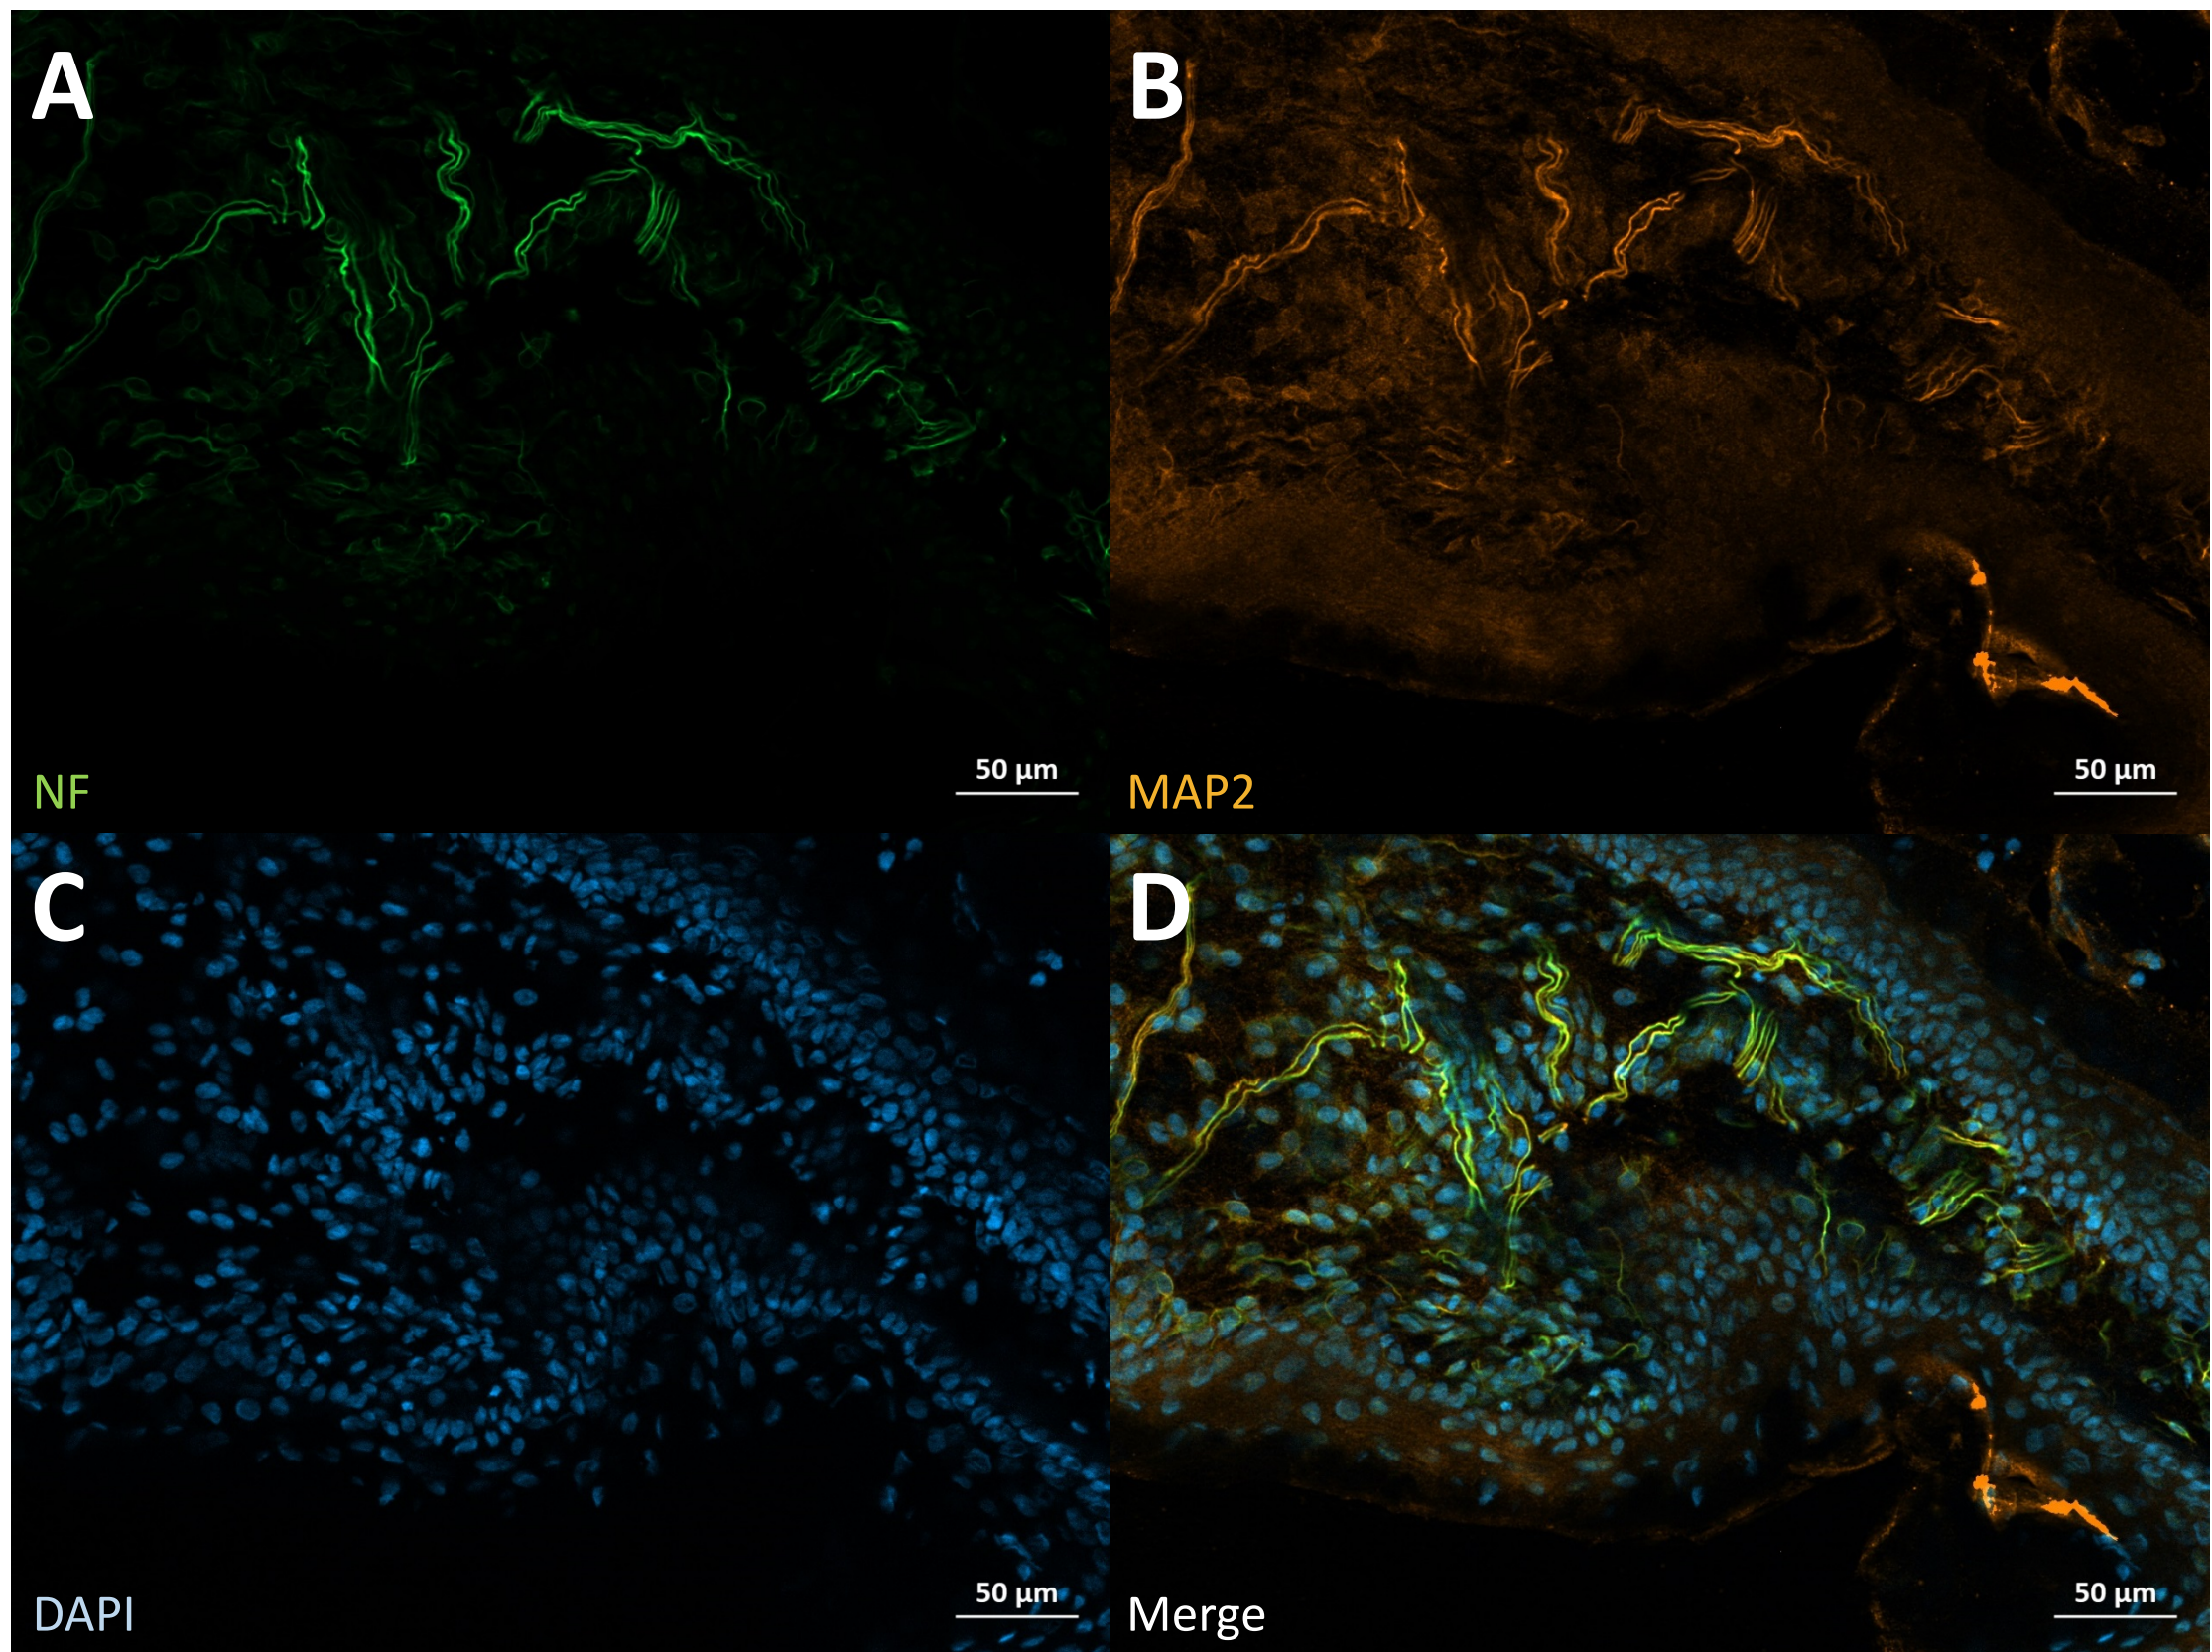

**Supplementary figure f**

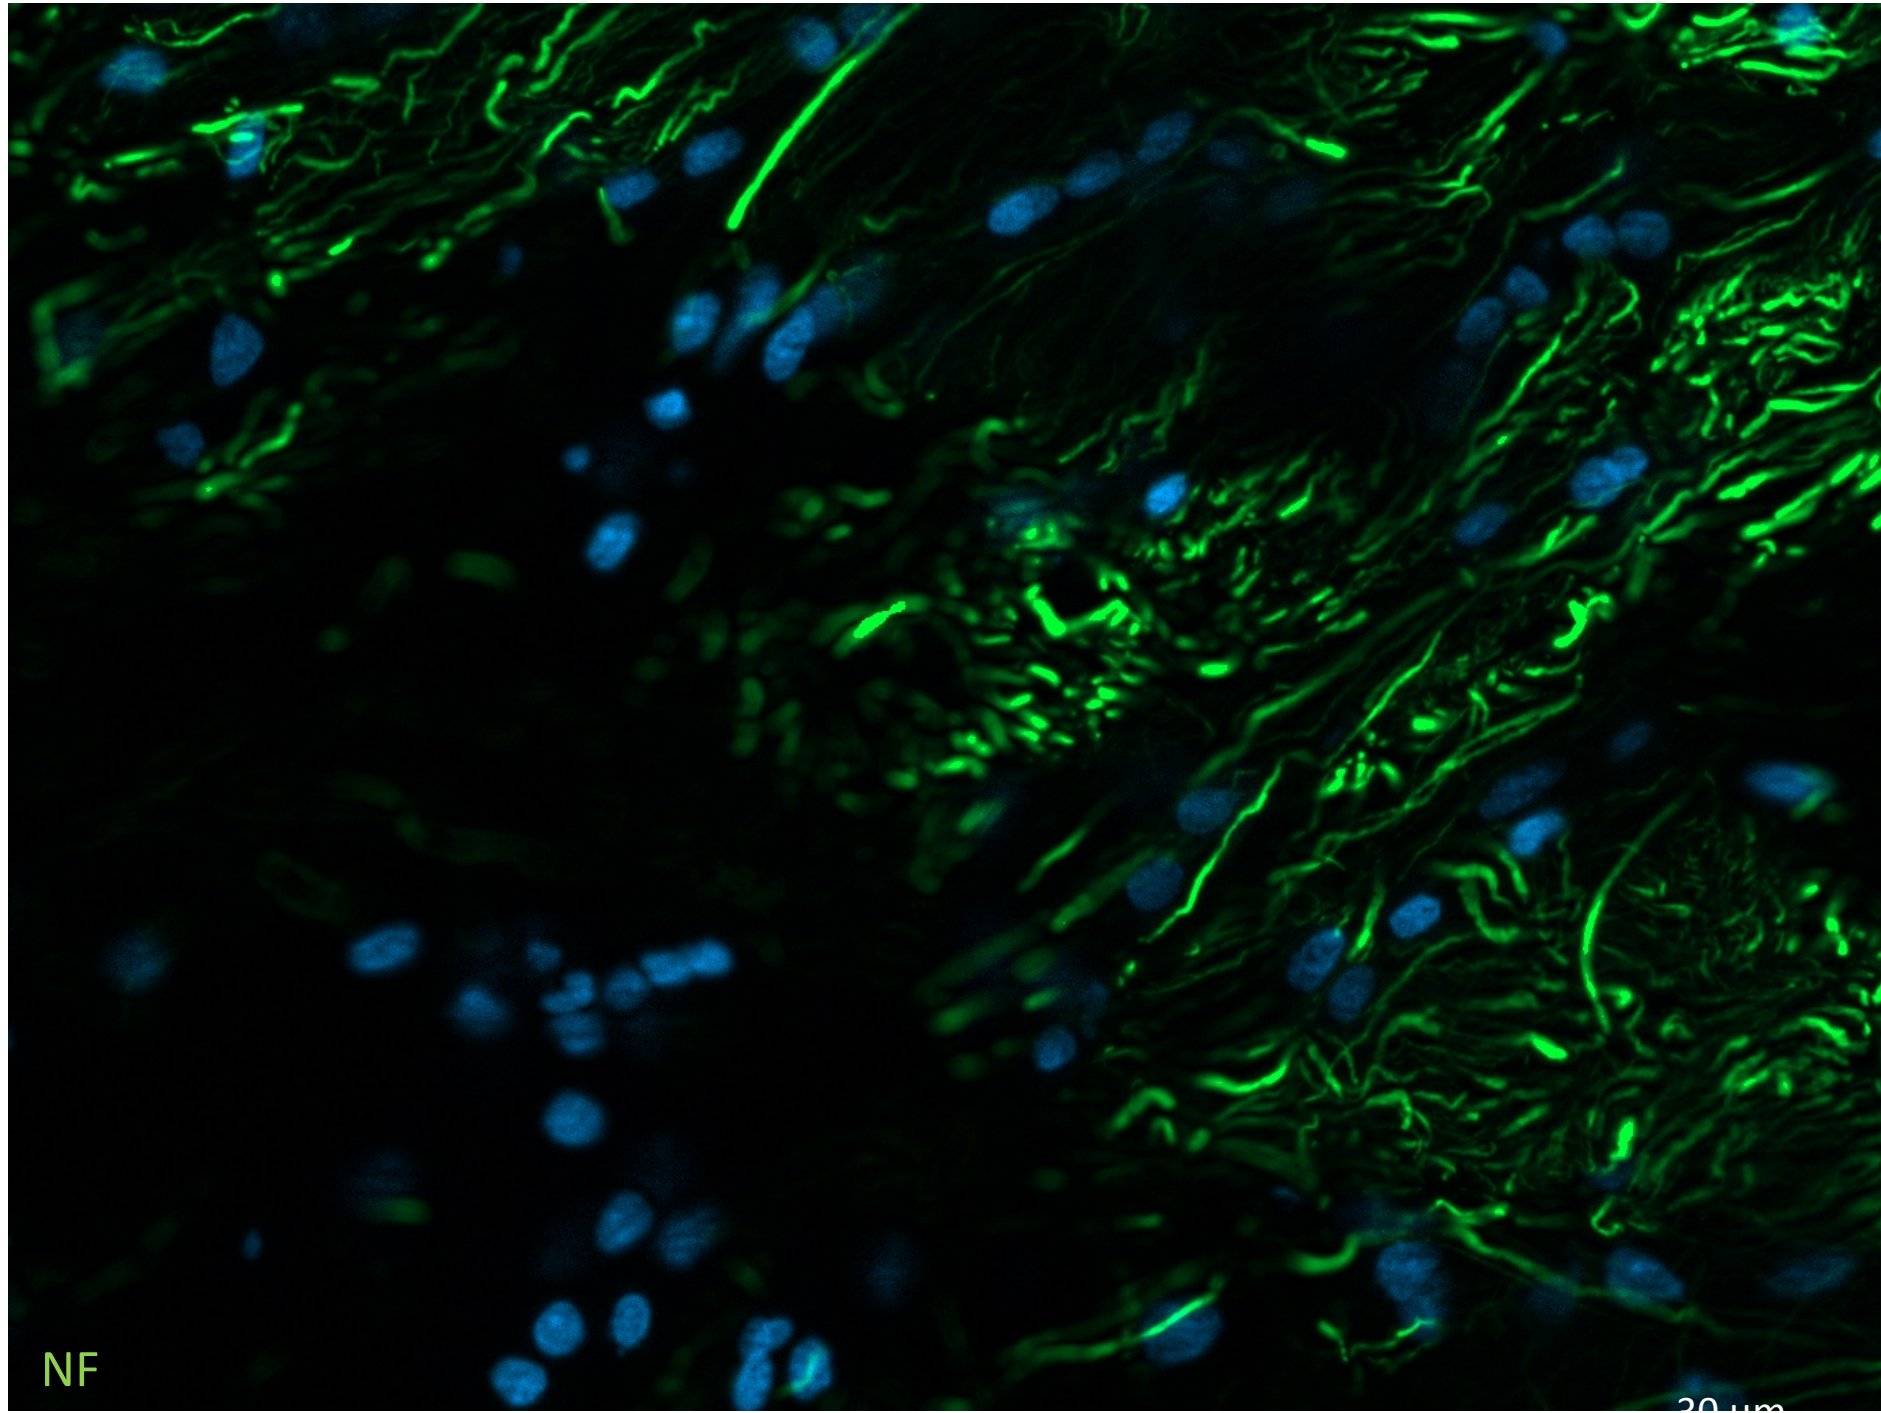

**Supplementary figure g**

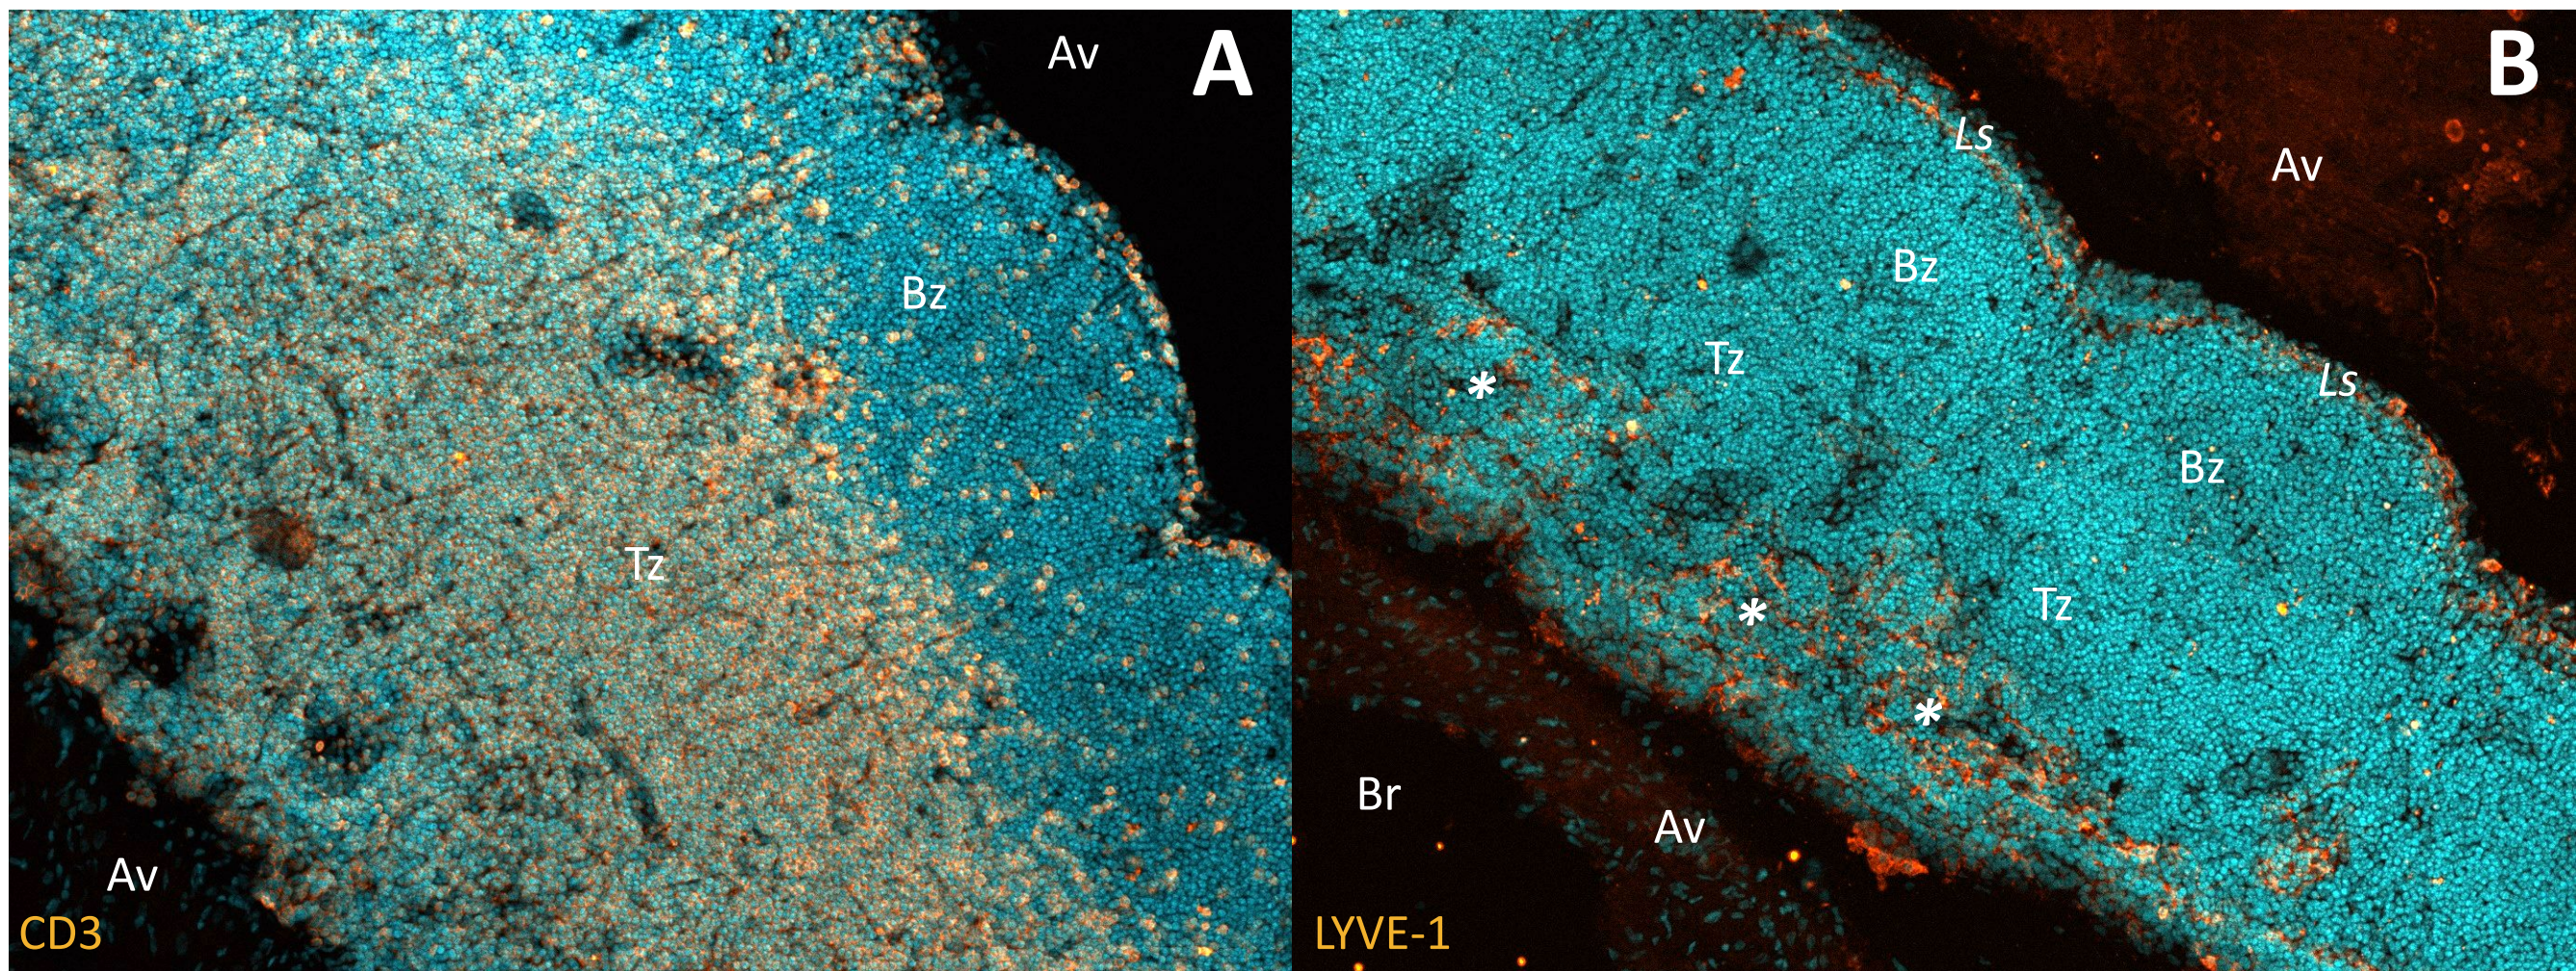

**Supplementary figure h**



Supplementary - table 1: statistical information about species, number of organs, slices and type of section

| <b>Organ / tissue</b>           | <b>samples total</b> | <b>slices each</b> | <b>slices total</b> | <b>species</b> | <b>serial section</b> |
|---------------------------------|----------------------|--------------------|---------------------|----------------|-----------------------|
| thymus                          | 4                    | 150                | 600                 | rat            | yes                   |
| spleen                          | 4                    | 100                | 400                 | rat            | yes                   |
| dermis                          | 4                    | 30                 | 120                 | rat            | no                    |
| NALT                            | 3                    | 30                 | 90                  | mouse          | yes                   |
| BALT                            | 3                    | 30                 | 90                  | rat            | yes                   |
| Peyer's patches                 | 4                    | 30                 | 120                 | rat            | yes                   |
| brain                           | 2                    | 30                 | 60                  | rat            | no                    |
| brain                           | 2                    | 30                 | 60                  | mouse          | no                    |
| bone marrow (femur)             | 2                    | 20                 | 40                  | rat            | no                    |
| superficial cervical lymph node | 4                    | 30                 | 120                 | rat            | yes                   |
| facial lymph node               | 4                    | 30                 | 120                 | rat            | yes                   |
| brachial lymph node             | 4                    | 30                 | 120                 | rat            | yes                   |
| axillary lymph node             | 4                    | 30                 | 120                 | rat            | yes                   |
| superior mesenteric lymph node  | 4                    | 30                 | 120                 | rat            | yes                   |
| inguinal lymph node             | 4                    | 30                 | 120                 | rat            | yes                   |
| popliteal lymph node            | 4                    | 30                 | 120                 | rat            | yes                   |
| renal lymph node                | 4                    | 30                 | 120                 | rat            | yes                   |
